# Supplementary material for: Identification of Metabonomics Changes in Longissimus Dorsi Muscle of Finishing Pigs Following Heat Stress through LC-MS/MS-Based Metabonomics Method
Source: MDPI journal article supplement (doi:10.3390/ani10010129), 2020-01-13
Supplement: s1 [file s1]

# Supplementary material

**Table S1. Composition and nutrient levels of the experimental diet (as-fed basis) %.**

| Items                         | Content |
|-------------------------------|---------|
| Ingredients                   |         |
| Corn                          | 66.20   |
| Soybean meal (42.8% CP)       | 20.00   |
| Wheat bran                    | 6.50    |
| Wheat middlings               | 4.00    |
| Limestone                     | 1.00    |
| CaHPO <sub>4</sub>            | 0.60    |
| NaCl                          | 0.40    |
| Premix <sup>1)</sup>          | 1.00    |
| L-Lys HCl                     | 0.30    |
| Total                         | 100.00  |
| Nutrient levels <sup>2)</sup> |         |
| Digestible energy (MJ /kg)    | 13.39   |
| Crude protein (%)             | 15.73   |
| Calcium (%)                   | 0.65    |
| Total phosphorus (%)          | 0.41    |
| Available phosphorus (%)      | 0.17    |
| Lysine (%)                    | 0.92    |
| Met+Cys (%)                   | 0.54    |

<sup>1)</sup> Premix provided the following per kg of the diet: vitamin A 2512 IU, vitamin D<sub>3</sub> 1200 IU, vitamin E 34 IU, vitamin K<sub>3</sub> 1.5 mg, vitamin B<sub>12</sub> 17.6 µg, riboflavin 2.5 mg, pantothenic acid 6.8 mg, nicotinic acid 20.3 mg, choline 351 mg, Mn 10 mg, Fe 50 mg, Zn 50 mg, Cu 10 mg, I 0.3 mg, Se 0.3 mg. <sup>2)</sup> Digestible energy (DE) and available phosphorus (AP) were calculated values, while the others were measured values.

**Table S2. Effects of constant heat stress on the growth performance in finishing pigs (n = 8).**

| Items                              | CR group           | HS group           | PF group           | P-value |
|------------------------------------|--------------------|--------------------|--------------------|---------|
| Average daily feed intake (ADFI)/g | 2936 <sup>Aa</sup> | 2449 <sup>Bb</sup> | 2472 <sup>Bb</sup> | <0.01   |
| Average daily gain (ADG)/g         | 873 <sup>a</sup>   | 649 <sup>b</sup>   | 750 <sup>ab</sup>  | 0.04    |
| Feed/ Gain Ratio (F/G)             | 0.296              | 0.264              | 0.303              | 0.27    |

In the same row, values with different small letter superscripts mean significant difference ( $p < 0.05$ ) and with different capital letter superscripts mean significant difference ( $p < 0.01$ ), while with the same or no letter superscripts mean no significant difference ( $p < 0.05$ ) .

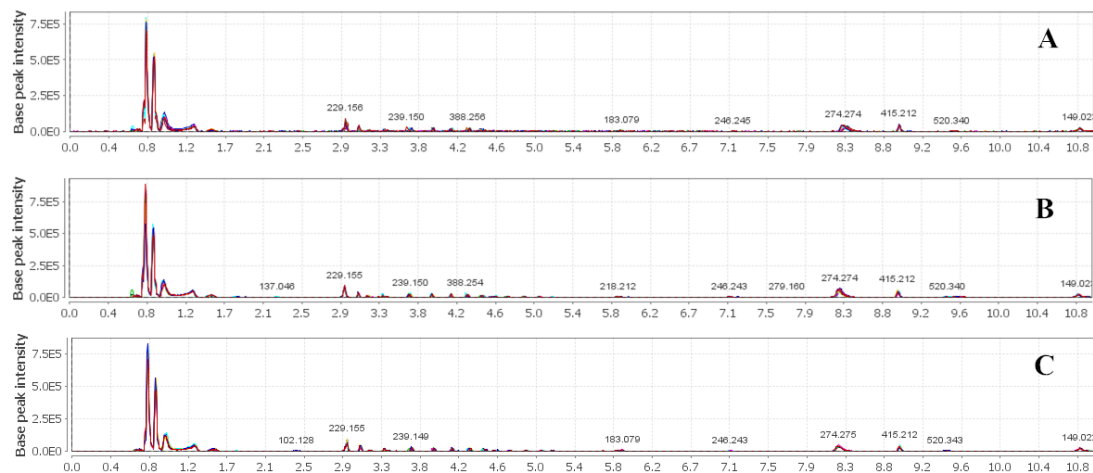

**Figure S1.** Base peak intensity (BPI) chromatograms of LD muscle samples using UPLC-ESI-QTOF-MS. A: BPI chromatograms of muscle samples obtained from CR pigs in positive mode; B: BPI chromatograms of muscle samples obtained from HS pigs in positive mode; C: BPI chromatograms of muscle samples obtained from PF pigs in positive mode.

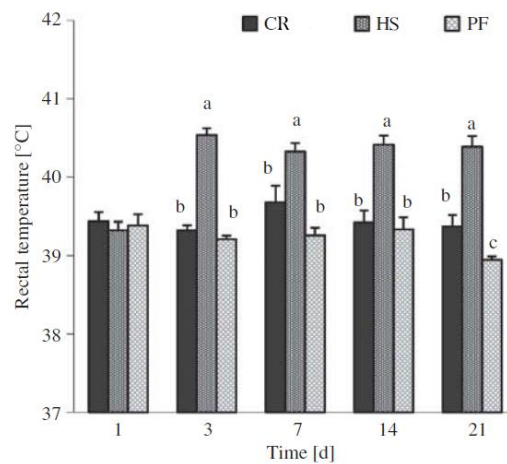

**Figure S2.** Effects of permanent heat exposure on rectal temperature.

Notes: CR, Control group housed at 22 °C with ad libitum feeding; HS, Group HS housed at 30 °C with ad libitum feeding; PF, Group PF housed at 22 °C and was pair-fed according to Group HS.

Values are means ( $n = 8$ ) with their standard error, represented by vertical bars. Within time, alues with different letters (a, b, c) are significantly different ( $p < 0.05$ ).
